# Supplementary material for: The Impact of Elongation on Change in Electrical Resistance of Electrically Conductive Yarns Woven into Fabric
Source: MDPI journal article supplement (doi:10.3390/ma14123390), 2021-06-18
Supplement: s1 [file s1]

*Supplementary materials*

# **The Impact of Elongation on Change in Electrical Resistance of Electrically Conductive Yarns Woven into Fabric**

**Željko Knezić <sup>1</sup>, Željko Penava <sup>1</sup>, Diana Šimić Penava <sup>2</sup> and Dubravko Rogale <sup>3,\*</sup>**

<sup>1</sup> Department of Textile Design and Management, Faculty of Textile Technology, University of Zagreb, 10000 Zagreb, Croatia; zeljko.knezic@ttf.unizg.hr (Ž.K.); zpenava@ttf.unizg.hr (Ž.P.)

<sup>2</sup> Department of Engineering Mechanics, Faculty of Civil Engineering, University of Zagreb, 10000 Zagreb, Croatia; dianas@grad.unizg.hr

<sup>3</sup> Department of Clothing Technology, Faculty of Textile Technology, University of Zagreb, 10000 Zagreb, Croatia

\* Correspondence: dubravko.rogale@ttf.unizg.hr

**Table S1.** The mean values of maximum force  $F_B$  and the corresponding elongation  $\epsilon_B$ , and the coefficients of variation CV.

| Fabric Tag | $\epsilon_B$ (%) |        | $F_B$ (N)     |        |
|------------|------------------|--------|---------------|--------|
|            | $\bar{x}$ (%)    | CV (%) | $\bar{x}$ (%) | CV (%) |
| X-0        | 45.80            | 8.64   | 1031.1        | 8.58   |
| Y-0        | 46.24            | 7.95   | 1045.4        | 8.02   |
| Z-0        | 46.70            | 8.12   | 1068.8        | 8.15   |
| X-45       | 64.04            | 7.32   | 843.8         | 7.42   |
| Y-45       | 65.36            | 8.18   | 865.8         | 8.11   |
| Z-45       | 65.98            | 8.46   | 884.2         | 8.32   |
| X-90       | 25.22            | 7.46   | 809.1         | 7.65   |
| Y-90       | 25.72            | 7.82   | 853.7         | 7.81   |
| Z-90       | 26.02            | 7.65   | 880.6         | 7.93   |

**Table S2.** Mean values of initial  $R_0$  and maximum electrical resistance  $R_E$ , and variation coefficients.

| Fabric Tag | $R_{01}$ ( $\Omega$ )  |        | $R_{02}$ ( $\Omega$ )  |        | $R_{E1}$ ( $\Omega$ )  |        | $R_{E2}$ ( $\Omega$ )  |        | $R_0$ ( $\Omega$ )     | $R_E$ ( $\Omega$ )     |
|------------|------------------------|--------|------------------------|--------|------------------------|--------|------------------------|--------|------------------------|------------------------|
|            | $\bar{x}$ ( $\Omega$ ) | CV (%) | $\bar{x}$ ( $\Omega$ ) | $\bar{x}$ ( $\Omega$ ) |
| X-0        | 14.21                  | 1.50   | 14.25                  | 1.43   | 18.19                  | 2.99   | 18.13                  | 2.84   | 14.23                  | 18.16                  |
| Y-0        | 10.55                  | 1.46   | 10.52                  | 1.29   | 11.42                  | 2.87   | 11.40                  | 2.78   | 10.53                  | 11.41                  |
| Z-0        | 2.98                   | 1.28   | 3.00                   | 1.32   | 3.09                   | 2.74   | 3.09                   | 2.97   | 2.99                   | 3.09                   |
| X-45       | 19.61                  | 1.31   | 19.66                  | 1.37   | 29.79                  | 2.68   | 30.32                  | 2.61   | 19.64                  | 30.06                  |
| Y-45       | 14.67                  | 1.42   | 14.72                  | 1.41   | 20.67                  | 2.61   | 20.37                  | 2.71   | 14.70                  | 20.52                  |
| Z-45       | 4.19                   | 1.48   | 4.21                   | 1.49   | 5.97                   | 3.01   | 5.79                   | 3.05   | 4.20                   | 5.88                   |
| X-90       | 53.38                  | 1.37   | 53.42                  | 1.51   | 175.72                 | 2.71   | 179.66                 | 2.69   | 53.40                  | 177.69                 |
| Y-90       | 40.71                  | 1.34   | 40.68                  | 1.33   | 101.34                 | 2.83   | 99.65                  | 2.71   | 40.70                  | 100.50                 |
| Z-90       | 11.77                  | 1.44   | 11.73                  | 1.46   | 39.74                  | 2.91   | 38.60                  | 2.85   | 11.75                  | 39.17                  |

**Table S3.** Coordinates of point A and coefficients of the curves of the mathematical model  $k$ ,  $a_0$ ,  $a_1$ ,  $a_2$ ,  $a_3$  and correlation coefficient  $r$ .

| Fabric Tag | A                |           | Linear Coefficient |        | Nonlinear Coefficients |        |       |        |        |
|------------|------------------|-----------|--------------------|--------|------------------------|--------|-------|--------|--------|
|            | $\epsilon_A$ (%) | $F_A$ (N) | $k$                | $r$    | $a_0$                  | $a_1$  | $a_2$ | $a_3$  | $r$    |
| X-0        | 1.38             | 8.41      | 4.81               | 0.9969 | 23.75                  | -13.91 | 2.062 | -0.028 | 0.9960 |
| Y-0        | 1.56             | 8.88      | 4.85               | 0.9945 | 26.50                  | -14.46 | 2.072 | -0.028 | 0.9961 |
| Z-0        | 1.74             | 10.40     | 4.97               | 0.9976 | 30.48                  | -15.10 | 2.096 | -0.028 | 0.9962 |
| X-45       | 3.78             | 8.49      | 1.76               | 0.9968 | 37.10                  | -9.94  | 0.644 | -0.005 | 0.9938 |
| Y-45       | 3.88             | 8.82      | 1.80               | 0.9989 | 43.48                  | -11.67 | 0.727 | -0.005 | 0.9924 |
| Z-45       | 3.96             | 9.15      | 1.85               | 0.9975 | 47.46                  | -12.65 | 0.775 | -0.006 | 0.9918 |
| X-90       | 1.12             | 21.19     | 17.24              | 0.9997 | -34.47                 | 49.69  | 0.036 | -0.027 | 0.9883 |
| Y-90       | 1.14             | 22.21     | 17.81              | 0.9998 | -36.38                 | 51.39  | 0.035 | -0.027 | 0.9883 |
| Z-90       | 1.16             | 22.96     | 18.14              | 0.9999 | -37.91                 | 52.47  | 0.030 | -0.027 | 0.9883 |

**Table S4.** Coordinates of point D and coefficients of the curves of the mathematical model  $p$ ,  $b_0$ ,  $b_1$ ,  $b_2$ ,  $b_3$  and correlation coefficient  $r$ .

| Fabric Tag | D                |                    | Linear Coefficient |        | Nonlinear Coefficients |        |        |         |        |
|------------|------------------|--------------------|--------------------|--------|------------------------|--------|--------|---------|--------|
|            | $\epsilon_D$ (%) | $R_D$ ( $\Omega$ ) | $p$                | $r$    | $b_0$                  | $b_1$  | $b_2$  | $b_3$   | $r$    |
| X-0        | 2.78             | 14.19              | -0.012             | 0.9985 | 14.21                  | -0.020 | 0.0059 | -0.0001 | 0.9962 |
| Y-0        | 13.82            | 10.34              | -0.015             | 0.9813 | 11.61                  | -0.185 | 0.0079 | -0.0001 | 0.9886 |
| Z-0        | 14.96            | 2.89               | -0.007             | 0.9836 | 2.98                   | -0.007 | 0.0001 | 0.0000  | 0.9937 |
| X-45       | 6.06             | 19.53              | -0.017             | 0.9982 | 19.77                  | -0.096 | 0.0098 | -0.0001 | 0.9990 |
| Y-45       | 7.64             | 14.64              | -0.009             | 0.9984 | 14.98                  | -0.065 | 0.0026 | 0.0000  | 0.9996 |
| Z-45       | 7.82             | 4.17               | -0.005             | 0.9980 | 4.30                   | -0.024 | 0.0009 | 0.0000  | 0.9991 |
| X-90       | 2.18             | 54.87              | 0.650              | 0.9983 | 53.23                  | 0.436  | 0.1426 | 0.0014  | 0.9999 |
| Y-90       | 2.24             | 41.20              | 0.184              | 0.9982 | 41.10                  | -0.215 | 0.1164 | -0.0007 | 0.9999 |
| Z-90       | 2.34             | 11.81              | 0.016              | 0.9978 | 12.13                  | -0.284 | 0.0637 | -0.0005 | 0.9997 |
